# Supplementary material for: LC-MS-MS Measurements of Urinary Creatinine and the Application of Creatinine Normalization Technique on Cotinine in Smokers’ 24 Hour Urine
Source: Hindawi journal article supplement (doi:10.1155/2012/245415), 2012-01-01
Supplement: f1 [file 245415.f1.zip]

Archive with 2 entries (2 files):
- S-Fig.1_JAMC_380650.pdf
- S-Fig.2_JAMC_380651.pdf
