# Supplementary figures and images for: LC-MS-MS Measurements of Urinary Creatinine and the Application of Creatinine Normalization Technique on Cotinine in Smokers’ 24 Hour Urine
Source: Hindawi journal article supplement (doi:10.1155/2012/245415), 2012-01-01

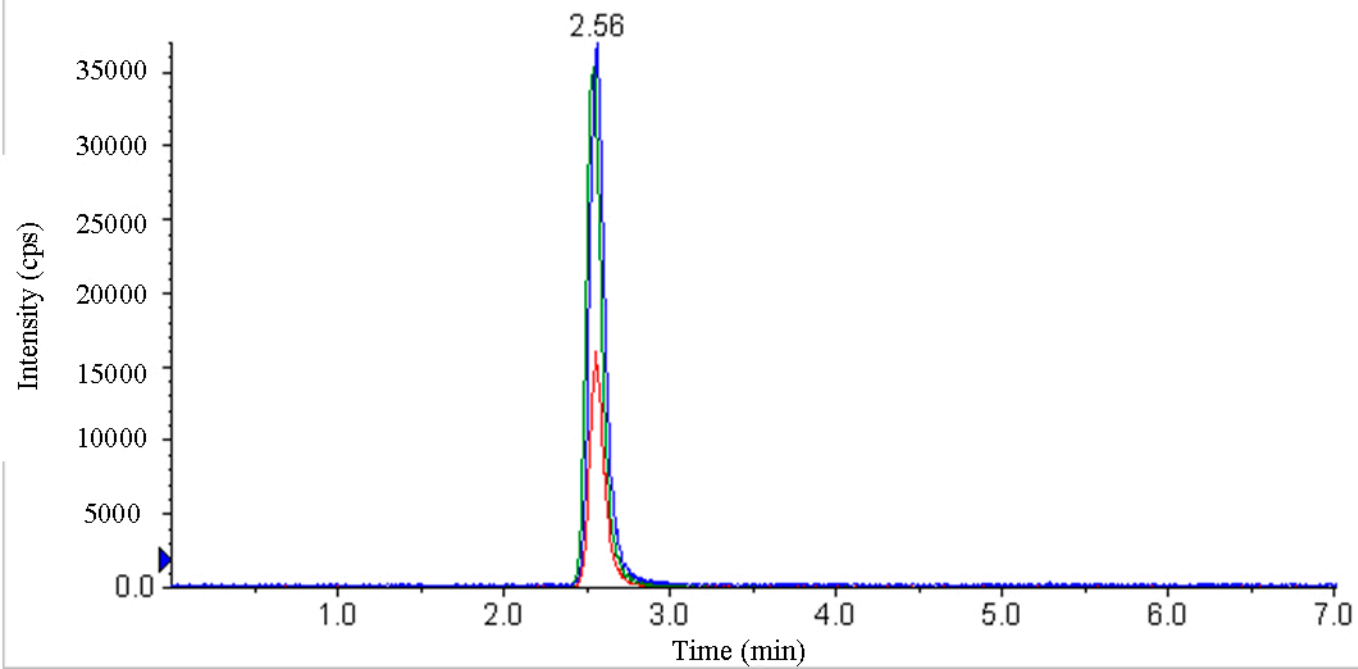

Supplement: f1 [file 245415.f1.zip]

Intensity (cps)

2.63

Time (min)

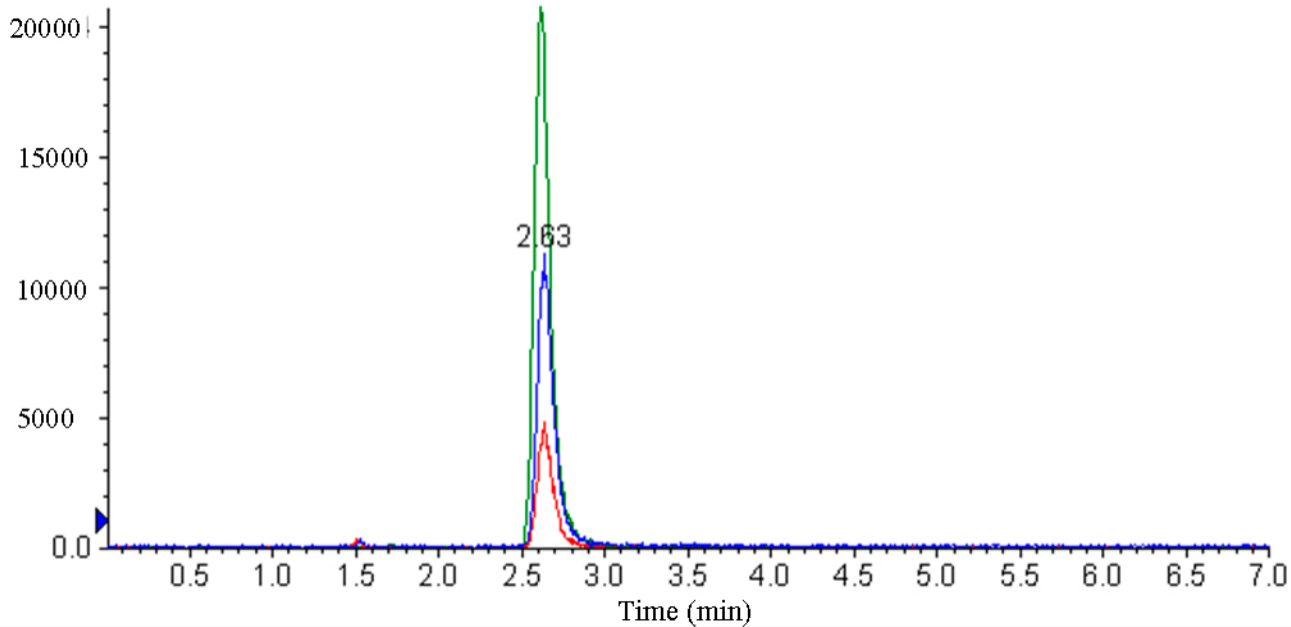

Supplement: f1 [file 245415.f1.zip › S-Fig.2_JAMC_380651.pdf]
